# Supplementary material for: Highly efficient removal of NO with ordered mesoporous manganese oxide at low temperature
Source: Royal Society of Chemistry journal article supplement (doi:10.1039/c4ra17300g), 2015-01-01
Supplement: c4ra17300g1.pdf [file c4ra17300g1.pdf]

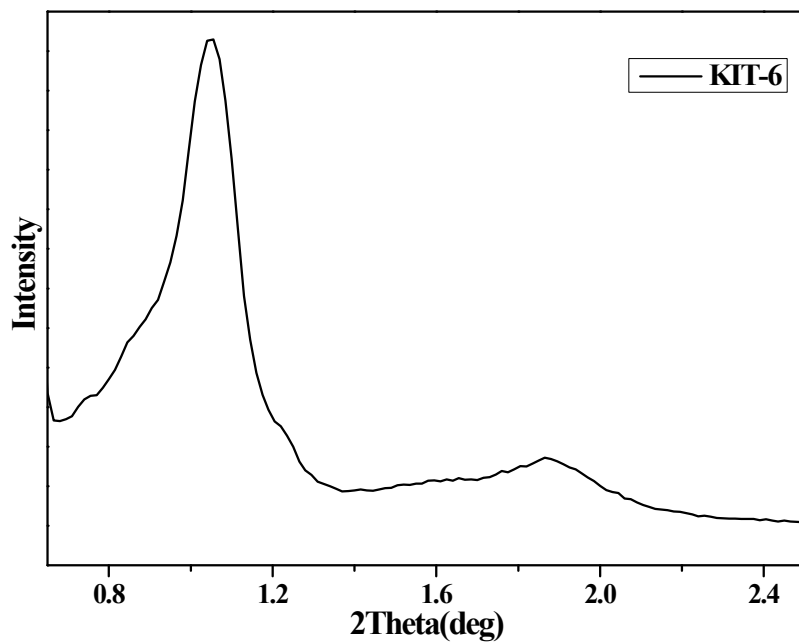

Figure 1S. Low-angle XRD pattern of KIT-6

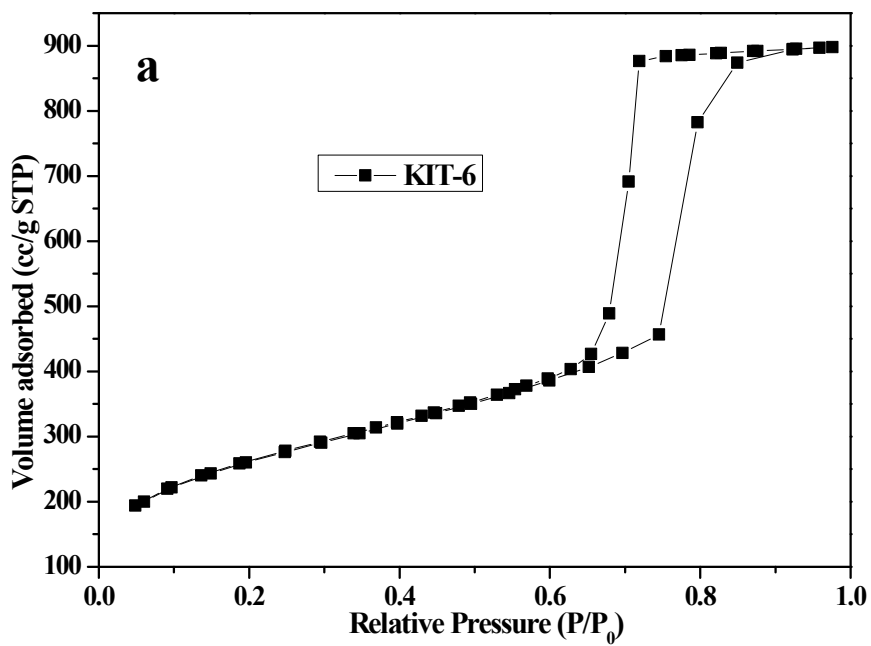

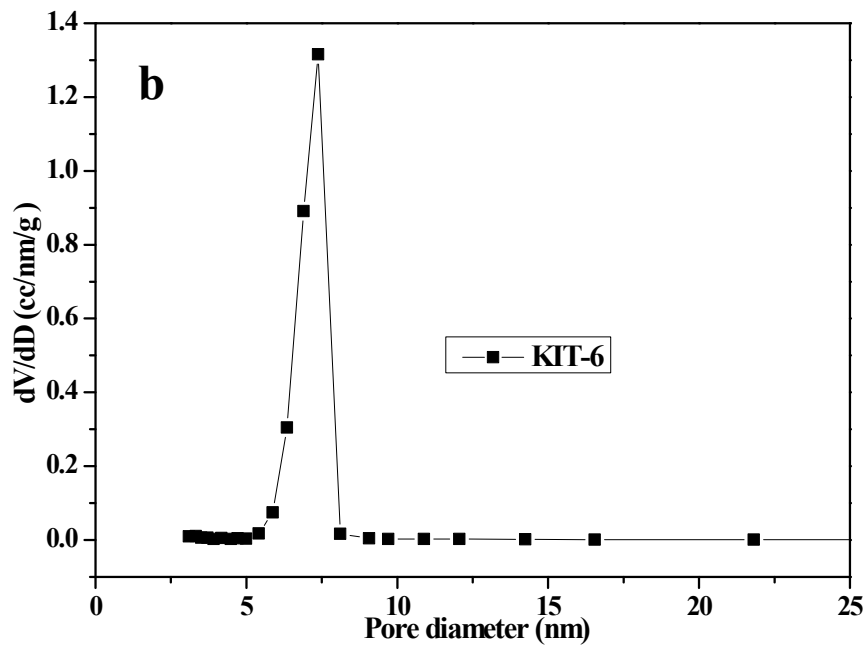

Figure 2S. N<sub>2</sub> adsorption-desorption isotherms (a) and pore diameter distribution (b) of KIT-6.
